# Supplementary material for: Optimization of Novel Human Acellular Dermal Dressing Sterilization for Routine Use in Clinical Practice
Source: MDPI journal article supplement (doi:10.3390/ijms22168467), 2021-08-06
Supplement: s1 [file s1]

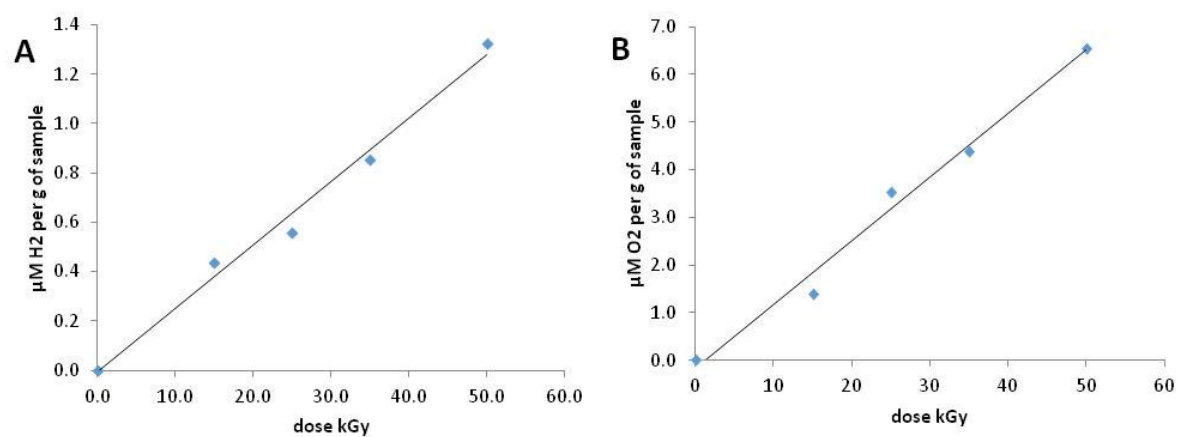

**Figure S1.** Dose-dependence of H<sub>2</sub> production (A) and O<sub>2</sub> consumption (B) in irradiated collagen, measured by gas chromatography. The yields: 0.026 μM H<sub>2</sub>/J, and 0.12 μM O<sub>2</sub>/J.
